# Supplementary material for: Dynamic remodeling of pelvic sagittal and hip coronal parameters after posterior spinal fusion in adolescent idiopathic scoliosis
Source: Research Square preprint supplement (doi:10.21203/rs.3.rs-7782644/v1), 2025-11-13
Supplement: Supplementary file 1 [file e8bb5b0375080453b4e0bbaf.docx]

**Table s1: Dynamic Changes in Spine–Pelvis–Hip Parameters in 10–14 yrs, Lenke 1 Patients (n=48) from Preoperative to Postoperative Follow-up**

| Variable | Preoperative | Postop 6 months | Postop 1 year | Postop 2 year | χ² / Stat | P value | n (paired) |
| --- | --- | --- | --- | --- | --- | --- | --- |
| IO | -0.65(-1.75,0.75) | -0.57(-1.09,0.23) | -0.99(-1.57,0.23) | -0.99(-1.47,-0.60) | 3.292 | 0.349 | 48 |
| SO | -1.70(-4.03,0.00) | -2.44(-3.27,-0.53) | -2.86(-4.20,-0.40) | -2.54(-2.81,-2.13) | 0.723 | 0.868 | 48 |
| LCEA  left | 28.45(22.15,32.80) | 29.13(27.12,31.05) | 28.62(24.95,30.38) | 29.46(28.92,29.99) | 7.121 | 0.068 | 48 |
| LCEA right | 33.10(27.80,39.30) | 35.91(31.93,37.05) | 33.92(28.57,35.95) | 33.91(33.31,34.37) | 6.625 | 0.085 | 48 |
| Tönnis left | 10.30(7.07,12.03) | 8.62(8.07,9.70) | 8.78(7.52,10.50) | 7.58(7.06,8.28) | 18.375 | <0.001 | 48 |
| Tönnis right | 9.70(6.12,11.35) | 7.45(6.20,8.53) | 7.99(6.75,10.72) | 7.38(7.06,8.04) | 12.257 | 0.007 | 48 |
| PI | 43.80(33.48,53.40) | 45.50(36.72,50.50) | 48.42(39.33,56.50) | 48.52(47.83,49.30) | 6.933 | 0.074 | 48 |
| PT | 9.55(5.60,12.68) | 12.07(5.57,13.62) | 10.59(6.95,13.60) | 12.29(10.97,12.60) | 2.737 | 0.434 | 48 |
| SS | 35.55(24.93,43.90) | 35.61(32.40,39.73) | 37.99(33.45,43.65) | 38.82(38.13,39.70) | 14.025 | 0.003 | 48 |

**Table s2: Dynamic Changes in Spine–Pelvis–Hip Parameters in 10–14 yrs, Lenke 5 Patients (n=24) from Preoperative to Postoperative Follow-up**

| Variable | Preoperative | Postop 6 months | Postop 1 year | Postop 2 year | χ² / Stat | P value | n (paired) |
| --- | --- | --- | --- | --- | --- | --- | --- |
| IO | -1.15(-3.65,0.00) | -0.80(-2.70,-0.45) | -1.49(-2.65,-0.42) | -1.10(-1.32,-0.70) | 2.774 | 0.428 | 24 |
| SO | -3.75(-5.80,0.53) | -2.28(-4.35,-0.79) | -3.65(-4.25,-2.05) | -2.65(-3.23,-1.88) | 3.979 | 0.264 | 24 |
| LCEA left | 27.30(24.33,31.50) | 27.65(25.00,29.62) | 28.35(25.73,30.15) | 29.42(28.50,30.15) | 4.850 | 0.183 | 24 |
| LCEA right | 30.70(27.12,35.58) | 32.75(28.08,35.62) | 32.48(29.50,35.05) | 33.96(33.07,34.28) | 6.900 | 0.075 | 24 |
| Tönnis left | 11.20(7.50,12.65) | 9.09(7.55,11.75) | 8.48(6.97,10.75) | 7.66(7.34,8.43) | 6.570 | 0.087 | 24 |
| Tönnis right | 10.65(8.08,11.98) | 8.35(6.30,12.38) | 8.27(7.31,11.05) | 7.34(6.98,8.06) | 9.908 | 0.019 | 24 |
| PI | 48.60(41.35,55.27) | 49.65(46.18,64.92) | 48.67(46.72,57.85) | 49.21(48.21,50.42) | 1.594 | 0.661 | 24 |
| PT | 10.40(5.20,15.30) | 14.10(8.30,16.35) | 10.84(9.60,15.15) | 12.64(11.20,13.40) | 3.000 | 0.392 | 24 |
| SS | 38.60(30.57,47.15) | 39.60(35.03,49.65) | 37.27(34.08,43.12) | 39.31(37.75,39.58) | 1.150 | 0.765 | 24 |

**Table s3: Dynamic Changes in Spine–Pelvis–Hip Parameters in 15–18 yrs, Lenke 1 Patients (n=31) from Preoperative to Postoperative Follow-up**

| Variable | Preoperative | Postop 6 months | Postop 1 year | Postop 2 year | χ² / Stat | P value | n (paired) |
| --- | --- | --- | --- | --- | --- | --- | --- |
| IO | -0.70(-2.35,0.60) | -0.86(-1.65,0.00) | -1.38(-2.00,-0.65) | -1.36(-1.90,-0.71) | 3.325 | 0.344 | 31 |
| SO | -3.10(-5.65,-0.85) | -2.37(-3.85,-1.10) | -3.30(-4.06,-2.28) | -2.57(-3.23,-2.27) | 1.335 | 0.721 | 31 |
| LCEA left | 28.10(24.45,30.25) | 28.00(25.25,29.76) | 28.36(25.30,29.08) | 29.36(28.37,29.75) | 3.503 | 0.320 | 31 |
| LCEA right | 35.40(30.95,38.25) | 35.20(33.15,36.24) | 34.17(32.71,34.67) | 33.44(32.82,34.26) | 6.600 | 0.086 | 31 |
| Tönnis left | 8.80(5.75,11.45) | 8.96(8.26,11.75) | 8.83(8.23,10.80) | 7.36(6.89,7.75) | 16.446 | <0.001 | 31 |
| Tönnis right | 8.10(5.15,10.20) | 7.78(6.87,10.05) | 7.76(6.04,9.05) | 7.31(7.01,7.80) | 2.484 | 0.478 | 31 |
| PI | 45.50(41.25,53.25) | 45.14(40.55,50.35) | 48.77(45.90,56.70) | 49.22(48.41,49.71) | 14.515 | 0.002 | 31 |
| PT | 10.50(7.00,16.15) | 13.30(11.24,16.80) | 10.93(8.80,13.50) | 12.07(11.33,12.46) | 8.476 | 0.037 | 31 |
| SS | 35.10(30.60,41.15) | 34.38(28.10,35.76) | 38.06(36.61,41.05) | 39.06(38.49,39.64) | 17.439 | <0.001 | 31 |

**Table s4: Dynamic Changes in Spine–Pelvis–Hip Parameters in 15–18 yrs, Lenke 5 Patients (n=12) from Preoperative to Postoperative Follow-up**

| Variable | Preoperative | Postop 6 months | Postop 1 year | Postop 2 year | χ² / Stat | P value | n (paired) |
| --- | --- | --- | --- | --- | --- | --- | --- |
| IO | -1.85(-3.33,-1.18) | -0.85(-2.08,-0.54) | -1.95(-2.52,-1.40) | -1.06(-1.85,-0.80) | 3.700 | 0.296 | 12 |
| SO | -4.70(-6.40,-1.27) | -2.90(-5.22,-2.50) | -2.96(-5.95,-2.47) | -2.45(-2.62,-2.25) | 3.706 | 0.295 | 12 |
| LCEA left | 30.55(27.43,35.30) | 28.84(26.45,32.20) | 29.18(26.65,31.76) | 29.29(29.07,29.79) | 2.500 | 0.475 | 12 |
| LCEA right | 36.30(31.82,39.58) | 36.69(34.91,43.10) | 34.35(31.40,37.53) | 34.08(33.76,34.36) | 3.504 | 0.320 | 12 |
| Tönnis left | 7.65(4.43,8.43) | 7.57(4.07,9.26) | 8.60(7.61,9.25) | 7.88(7.48,8.13) | 9.500 | 0.023 | 12 |
| Tönnis right | 8.80(5.72,9.90) | 7.33(4.60,7.62) | 8.21(5.95,9.95) | 7.00(6.70,7.25) | 9.200 | 0.027 | 12 |
| PI | 47.55(36.23,52.45) | 44.79(39.67,48.20) | 46.14(41.77,51.40) | 48.60(48.17,49.74) | 4.563 | 0.207 | 12 |
| PT | 7.80(4.60,13.22) | 9.41(0.88,12.40) | 10.02(9.05,11.70) | 11.70(10.53,12.31) | 1.300 | 0.729 | 12 |
| SS | 41.05(29.95,44.42) | 35.51(34.15,41.67) | 36.60(30.62,40.37) | 39.20(38.20,40.01) | 1.500 | 0.682 | 12 |
